# Supplementary material
Source: MDPI journal article supplement (https://www.mdpi.com/2073-4395/12/11/2751)
Supplement: s1 [file s1]

**Table S1.** Sum of precipitation and mean temperatures during season 2017/18 in the sites of study.

| Month | Precipitation |           |         | Temperature |           |         |
|-------|---------------|-----------|---------|-------------|-----------|---------|
|       | Winna Góra    | Swojczyce | Wrocław | Winna Góra  | Swojczyce | Wrocław |
| X     | 44.1          | 71.4      | 61.3    | 11.1        | 11.2      | 10.9    |
| XI    | 32.9          | 34.8      | 26.9    | 5.7         | 5.7       | 5.5     |
| XII   | 37.7          | 27.1      | 14      | 2.1         | 3         | 2.4     |
| I     | 57            | 20.6      | 15.6    | 2.1         | 2.9       | 2.6     |
| II    | 2.8           | 2.8       | 0.5     | -2.7        | -2.7      | -2.7    |
| III   | 36.4          | 26.5      | 9.6     | 1.2         | 1.1       | 1.4     |
| IV    | 28.9          | 24.6      | 11.3    | 13.7        | 13.9      | 13.8    |
| V     | 37.2          | 49.4      | 40.6    | 17.5        | 17        | 16.8    |
| VI    | 48.0          | 51.1      | 70.6    | 19.0        | 19.5      | 18.7    |
| VII   | 112.8         | 72.9      | 54.6    | 20.9        | 20.8      | 19.8    |

**Table S2.** Sum of precipitation and mean temperatures during season 2018/19 in the sites of study.

| Month | Precipitation |            |           |         |          | Temperature |            |           |         |          |
|-------|---------------|------------|-----------|---------|----------|-------------|------------|-----------|---------|----------|
|       | Lipnik        | Czesławice | Swojczyce | Wrocław | Mydlniki | Lipnik      | Czesławice | Swojczyce | Wrocław | Mydlniki |
| X     | 16.2          | 41.3       | 46.1      | 32.2    | 52.6     | 13.4        | 9.2        | 10.5      | 10.6    | 8.2      |
| XI    | 5.9           | 15.2       | 12.5      | 10.1    | 42.5     | 8.4         | 3.9        | 5.3       | 5.3     | 3.3      |
| XII   | 70.0          | 70.8       | 41.7      | 40.3    | 45.6     | 3.7         | -0.2       | 2.6       | 2.6     | -0.9     |
| I     | 28.0          | 31.5       | 49.6      | 33.2    | 44.6     | -2.5        | -3.4       | -0.2      | -0.2    | -0.9     |
| II    | 32.0          | 14.6       | 27.4      | 25.0    | 13.1     | -1.6        | 2.5        | 3.2       | 3.5     | -2.7     |
| III   | 37.5          | 27.1       | 23.9      | 27.7    | 21.2     | 3.4         | 5.5        | 6.5       | 6.7     | 1.4      |
| IV    | 2.5           | 39.0       | 40.7      | 29.4    | 77.1     | 8.6         | 10.3       | 10.2      | 10.6    | 15.7     |
| V     | 39.5          | 87.0       | 92.8      | 57.0    | 207.6    | 13.4        | 14.4       | 12.2      | 12.0    | 16.9     |
| VI    | 35.0          | 11.2       | 23.3      | 8.8     | 22.8     | 16.8        | 22.9       | 22.5      | 22.3    | 18.8     |
| VII   | 22.0          | 46.3       | 48.1      | 33.0    | 54.1     | 18.4        | 20.0       | 19.9      | 19.3    | 20.1     |

**Table S3.** Sum of precipitation and mean temperatures during season 2019/20 in the sites of study.

| Month | Precipitation |          | Temperature |          |
|-------|---------------|----------|-------------|----------|
|       | Czesławice    | Mydlniki | Czesławice  | Mydlniki |
| X     | 37            | 37.7     | 12.6        | 8.7      |
| XI    | 56.3          | 42.4     | 6.6         | 3.7      |
| XII   | 46.3          | 38.0     | 2.6         | -0.8     |
| I     | 14.1          | 15.2     | 1.2         | -2.1     |
| II    | 76.5          | 41.3     | 3.2         | -0.5     |
| III   | 26.0          | 15.0     | 4.7         | 9.3      |
| IV    | 19.0          | 8.1      | 8.6         | 10.8     |
| V     | 111.4         | 91.2     | 11.2        | 12.0     |
| VI    | 170.2         | 87.4     | 17.9        | 21.0     |
| VII   | 67.8          | 72.9     | 18.6        | 19.6     |

**Table S4.** The *t*-test values and *p*-values for comparison between empirical and theoretical models for biomass competition in replacement series design in 2017-2018.

| Site      |                 | RYr   | RYww  | TRY     | RYs   | RYww  | TRY     |
|-----------|-----------------|-------|-------|---------|-------|-------|---------|
| Winna     | <i>t</i> -test  | -0.69 | -0.58 | -2.75 * | -0.81 | -0.40 | -2.57 * |
| Góra      | <i>p</i> -value | 0.494 | 0.565 | 0.010   | 0.424 | 0.690 | 0.015   |
| Swojczyce | <i>t</i> -test  | -0.79 | 0.25  | -2.13 * | -1.86 | 1.96  | 0.49    |
|           | <i>p</i> -value | 0.434 | 0.807 | 0.041   | 0.072 | 0.058 | 0.625   |
| Wrocław   | <i>t</i> -test  | -0.66 | 0.85  | 0.44    | -1.36 | 1.56  | 0.32    |
|           | <i>p</i> -value | 0.511 | 0.399 | 0.662   | 0.184 | 0.128 | 0.748   |

\* P<0.05

**Table S5.** The *t*-test values and *p*-values for comparison between empirical and theoretical models for number of seeds competition in replacement series design in 2017-18.

| Site      |                 | RYr   | RYww  | TRY   | RYs   | RYww   | TRY     |
|-----------|-----------------|-------|-------|-------|-------|--------|---------|
| Winna     | <i>t</i> -test  | -1.41 | 1.54  | 0.82  | -0.57 | 1.60   | 1.73    |
| Góra      | <i>p</i> -value | 0.167 | 0.132 | 0.415 | 0.570 | 0.120  | 0.092   |
| Swojczyce | <i>t</i> -test  | -0.81 | 1.87  | 2.32* | -1.73 | 2.78** | 1.70    |
|           | <i>p</i> -value | 0.423 | 0.071 | 0.026 | 0.093 | 0.009  | 0.098   |
| Wrocław   | <i>t</i> -test  | -1.03 | 1.75  | 2.27* | -0.92 | 2.48*  | 3.68*** |
|           | <i>p</i> -value | 0.311 | 0.090 | 0.029 | 0.363 | 0.018  | <0.001  |

\* P<0.05; \*\* P<0.01; \*\*\* P<0.001

**Table S6.** Mean squares from the three-way analysis of variance for the competitive ratio of winter wheat (WW) and herbicide-resistant or susceptible cornflower (B) calculated for the relative plants' biomass (CRb) and relative seed number (CRse) at two plant ratios 6WW:4B and 4WW:6B, in the seasons 2017-2018.

| Source of variation    | d.f. | CRse     | CRb     |
|------------------------|------|----------|---------|
| Site                   | 2    | 422.44** | 78.36** |
| Ratio                  | 1    | 58.23    | 10.65   |
| Biotype                | 1    | 194.86   | 96.66** |
| Site × Ratio           | 2    | 70.00    | 9.85    |
| Site × Biotype         | 2    | 325.56** | 54.28*  |
| Ratio × Biotype        | 1    | 28.81    | 18.02   |
| Site × Ratio × Biotype | 2    | 12.27    | 32.37   |
| Residual               | 24   | 54.55    | 11.70   |

d.f. – the number of degrees of freedom; \* P<0.05; \*\* P<0.01

**Table S7.** Results of discrimination analysis for the first and second canonical variables (CV<sub>1</sub>, CV<sub>2</sub>) for seven parameters of winter wheat (WW) in competition with herbicide-resistant or susceptible cornflower (B) in the season 2017-2018, depending on hydrothermal conditions and soil texture at the study sites.

| Parameter of WW                                  | CV <sub>1</sub> | CV <sub>2</sub> |
|--------------------------------------------------|-----------------|-----------------|
| Length of plant                                  | 0.4262          | -0.8011*        |
| Yield                                            | 0.6741*         | 0.5826          |
| TGW                                              | 0.6651*         | -0.7162*        |
| Biomass of plant                                 | -0.2369         | -0.5994         |
| Number of grains per plant                       | -0.5160         | -0.6717*        |
| Days from sowing till emergence                  | -0.5135         | 0.1830          |
| Day-difference between the emergence of WW and B | 0.6005          | -0.5885         |

\* P<0.05

**Table S8.** The *t*-test values and *p*-values for comparison between empirical and theoretical models for biomass competition in replacement series design in 2018-2019.

| Site       |                 | RYr   | RYww  | TRY    | RYs   | RYww   | TRY     |
|------------|-----------------|-------|-------|--------|-------|--------|---------|
| Lipnik     | <i>t</i> -test  | -0.52 | 2.59* | 2.79** | -0.18 | 3.19** | 4.61*** |
|            | <i>p</i> -value | 0.604 | 0.014 | 0.009  | 0.857 | 0.003  | <0.001  |
| Czesławice | <i>t</i> -test  | -0.93 | 1.07  | 0.48   | -0.11 | 1.48   | 3.35**  |
|            | <i>p</i> -value | 0.357 | 0.292 | 0.631  | 0.915 | 0.149  | 0.002   |
| Swojczyce  | <i>t</i> -test  | -0.69 | 0.95  | 0.41   | -0.90 | 1.03   | 0.32    |
|            | <i>p</i> -value | 0.496 | 0.347 | 0.684  | 0.377 | 0.311  | 0.754   |
| Wrocław    | <i>t</i> -test  | -0.72 | 0.53  | -0.76  | -0.37 | 0.00   | -0.84   |
|            | <i>p</i> -value | 0.477 | 0.597 | 0.455  | 0.717 | 1.000  | 0.405   |
| Mydlniki   | <i>t</i> -test  | -0.13 | -0.84 | -1.92  | -0.18 | -0.74  | -2.40*  |
|            | <i>p</i> -value | 0.894 | 0.407 | 0.064  | 0.860 | 0.465  | 0.022   |

\* P<0.05; \*\* P<0.01; \*\*\* P<0.001

**Table S9.** The *t*-test values and *p*-values for comparison between empirical and theoretical models for number of seeds competition in replacement series design in 2018-2019.

| Site       |                 | RYr   | RYww   | TRY    | RYs   | RYww    | TRY     |
|------------|-----------------|-------|--------|--------|-------|---------|---------|
| Lipnik     | <i>t</i> -test  | -1.37 | 3.26** | 2.58*  | -1.12 | 3.62*** | 4.22*** |
|            | <i>p</i> -value | 0.181 | 0.003  | 0.014  | 0.271 | 0.001   | <0.001  |
| Czesławice | <i>t</i> -test  | -0.58 | 1.19   | 1.07   | -0.28 | 1.22    | 2.64*   |
|            | <i>p</i> -value | 0.568 | 0.244  | 0.294  | 0.782 | 0.230   | 0.013   |
| Swojczyce  | <i>t</i> -test  | -0.34 | 1.22   | 1.86   | -0.58 | 0.88    | 0.52    |
|            | <i>p</i> -value | 0.733 | 0.232  | 0.071  | 0.567 | 0.387   | 0.607   |
| Wrocław    | <i>t</i> -test  | 1.31  | 0.08   | 2.64*  | 1.18  | -0.10   | 1.94    |
|            | <i>p</i> -value | 0.199 | 0.934  | 0.012  | 0.248 | 0.921   | 0.061   |
| Mydlniki   | <i>t</i> -test  | -0.42 | -0.42  | -2.40* | -0.39 | -0.58   | -3.29** |
|            | <i>p</i> -value | 0.680 | 0.674  | 0.022  | 0.700 | 0.563   | 0.002   |

\* P<0.05; \*\* P<0.01; \*\*\* P<0.001

**Table S10.** Mean squares from the three-way analysis of variance for the competitive ratio of winter wheat (WW) and herbicide-resistant or susceptible cornflower (B) calculated for the relative plants' biomass (CRb) and relative seed number (CRse) at two plant ratios 6WW:4B and 4WW:6B, in the seasons 2018-2019.

| Source of variation    | d.f. | CRse     | CRb      |
|------------------------|------|----------|----------|
| Site                   | 4    | 55.35*** | 22.61*** |
| Ratio                  | 1    | 4.44     | 0.89     |
| Biotype                | 1    | 21.50**  | 0.57     |
| Site × Ratio           | 4    | 4.18     | 0.77     |
| Site × Biotype         | 4    | 7.88*    | 1.95     |
| Ratio × Biotype        | 1    | 1.22     | 0.02     |
| Site × Ratio × Biotype | 4    | 7.21     | 2.41     |
| Residual               | 40   | 2.92     | 3.09     |

d.f. – the number of degrees of freedom; \* P<0.05; \*\* P<0.01; \*\*\* P<0.001

**Table S11.** Results of discrimination analysis for the first and second canonical variables (CV<sub>1</sub>, CV<sub>2</sub>) for seven parameters of winter wheat (WW) in competition with herbicide-resistant or susceptible cornflower (B) in the season 2018-2019, depending on hydrothermal conditions and soil texture at the study sites.

| Parameter of WW                                  | CV <sub>1</sub> | CV <sub>2</sub> |
|--------------------------------------------------|-----------------|-----------------|
| Length of plant                                  | -0.3401         | -0.5686         |
| Yield of grains                                  | 0.8209**        | 0.4905          |
| TGW                                              | -0.4375         | 0.8008**        |
| Biomass of plant                                 | 0.8758***       | 0.4330          |
| Number of grains per plant                       | 0.9396***       | 0.2475          |
| Days from sowing till emergence                  | 0.0671          | -0.1402         |
| Day-difference between the emergence of WW and B | 0.4554          | 0.4690          |

\*\* P<0.01; \*\*\* P<0.001

**Table S12.** The *t*-test values and *p*-values for comparison between empirical and theoretical models for biomass competition in replacement series design in 2019-2020.

| Site       |                 | RYr   | RYww  | TRY   | RYs   | RYww  | TRY     |
|------------|-----------------|-------|-------|-------|-------|-------|---------|
| Czesławice | <i>t</i> -test  | -0.43 | 1.37  | 2.26* | 0.73  | 0.95  | 3.65*** |
|            | <i>p</i> -value | 0.671 | 0.180 | 0.030 | 0.473 | 0.348 | <0.001  |
| Mydlniki   | <i>t</i> -test  | 0.03  | -0.39 | -1.11 | -0.68 | -0.67 | -2.73*  |
|            | <i>p</i> -value | 0.976 | 0.696 | 0.273 | 0.499 | 0.507 | 0.010   |

\* P<0.05; \*\*\* P<0.001

**Table S13.** The *t*-test values and *p*-values for comparison between empirical and theoretical models for number of seeds competition in replacement series design in 2019-2020.

| Site       |                 | RYr   | RYww  | TRY   | RYs   | RYww  | TRY    |
|------------|-----------------|-------|-------|-------|-------|-------|--------|
| Czesławice | <i>t</i> -test  | -0.26 | 1.13  | 1.87  | -0.12 | 0.66  | 1.08   |
|            | <i>p</i> -value | 0.799 | 0.267 | 0.071 | 0.906 | 0.517 | 0.286  |
| Mydlniki   | <i>t</i> -test  | 0.74  | -0.19 | 1.46  | -0.48 | -0.26 | -2.14* |
|            | <i>p</i> -value | 0.465 | 0.848 | 0.155 | 0.638 | 0.793 | 0.040  |

\* P<0.05

**Table S14.** Mean squares from the three-way analysis of variance for the competitive ratio of winter wheat (WW) and herbicide-resistant or susceptible cornflower (B) calculated for the relative plants' biomass (CRb) and relative seed number (CRse) at two plant ratios 6WW:4B and 4WW:6B, in the seasons 2019-2020.

| Source of variation    | d.f. | CRse | CRb  |
|------------------------|------|------|------|
| Site                   | 1    | 0.00 | 0.50 |
| Ratio                  | 1    | 0.34 | 0.13 |
| Biotype                | 1    | 0.66 | 0.13 |
| Site × Ratio           | 1    | 0.01 | 0.33 |
| Site × Biotype         | 1    | 0.08 | 0.17 |
| Ratio × Biotype        | 1    | 0.03 | 0.01 |
| Site × Ratio × Biotype | 1    | 0.19 | 0.19 |
| Residual               | 16   | 0.26 | 0.18 |

d.f. – the number of degrees of freedom;

**Table S15.** Results of discrimination analysis for the first and second canonical variables (CV<sub>1</sub>, CV<sub>2</sub>) for seven parameters of winter wheat (WW) in competition with herbicide-resistant or susceptible cornflower (B) in the season 2019-2020, depending on hydrothermal conditions and soil texture at the study sites.

| Parameter of WW                                  | CV <sub>1</sub> | CV <sub>2</sub> |
|--------------------------------------------------|-----------------|-----------------|
| Length of plant                                  | -0.9889*        | 0.0498          |
| Yield of grains                                  | -0.9589*        | -0.2217         |
| TGW                                              | -0.5040         | -0.8267         |
| Biomass of plant                                 | -0.9995***      | 0.0079          |
| Number of grains per plant                       | -0.9936**       | 0.0224          |
| Days from sowing till emergence                  | -0.9836*        | -0.0353         |
| Day-difference between the emergence of WW and B | -0.7093         | 0.3521          |

\* P<0.05; \*\* P<0.01; \*\*\* P<0.001
